# Supplementary material for: Biokinetics and clearance of inhaled gold ultrasmall-in-nano architectures
Source: PubMed Central journal article supplement (PMC9417912; doi:10.1039/d0na00521e), 2020-07-22
Supplement: NA-002-D0NA00521E-s001.pdf [file NA-002-D0NA00521E-s001.pdf]

SUPPORTING INFORMATION

**Biokinetics and clearance of inhaled gold ultrasmall-in-nano architectures**

Ana Katrina Mapanao,<sup>#,1,2</sup> Giulia Giannone,<sup>#,1,2</sup> Maria Summa,<sup>#,3</sup> Maria Laura Ermini,<sup>1</sup> Agata Zamborlin,<sup>1,2</sup> Melissa Santi,<sup>1</sup> Domenico Cassano,<sup>1</sup> Rosalia Bertorelli,<sup>3</sup> and Valerio Voliani<sup>\*,1</sup>

<sup>1</sup>. Center for Nanotechnology Innovation@NEST, Istituto Italiano di Tecnologia, Piazza San Silvestro, 12 - 56127, Pisa, Italy

<sup>2</sup>. NEST-Scuola Normale Superiore, Piazza San Silvestro, 12 - 56127, Pisa, Italy

<sup>3</sup>. Translational Pharmacology, Istituto Italiano di Tecnologia, Via Morego, 30 - 16163, Genoa, Italy

<sup>#</sup>these authors have contributed equally

\*Corresponding Author: [valerio.voliani@iit.it](mailto:valerio.voliani@iit.it)

## Supplementary Figures and Tables

Figure S1

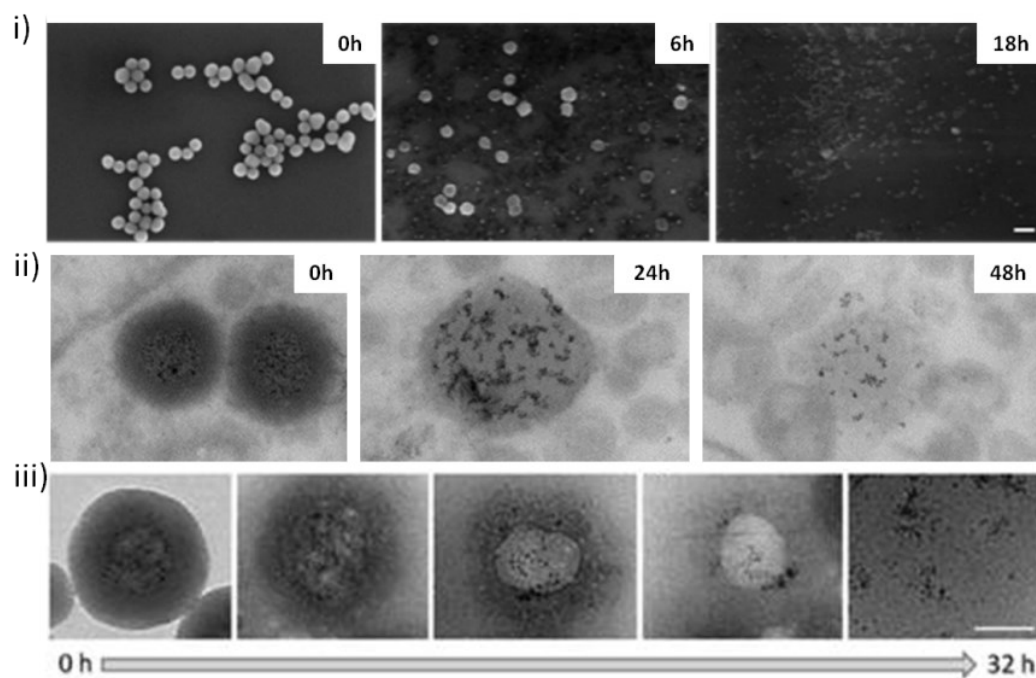

**Figure S1** Electron microscopy imaging of NAs biodegradation in biological environment. i) 20% full human serum at 37 °C under stirring. ii) 2D-cultured MIA PaCa-2 cells. iii) full human blood at 37 °C under stirring.

**Figure S2**

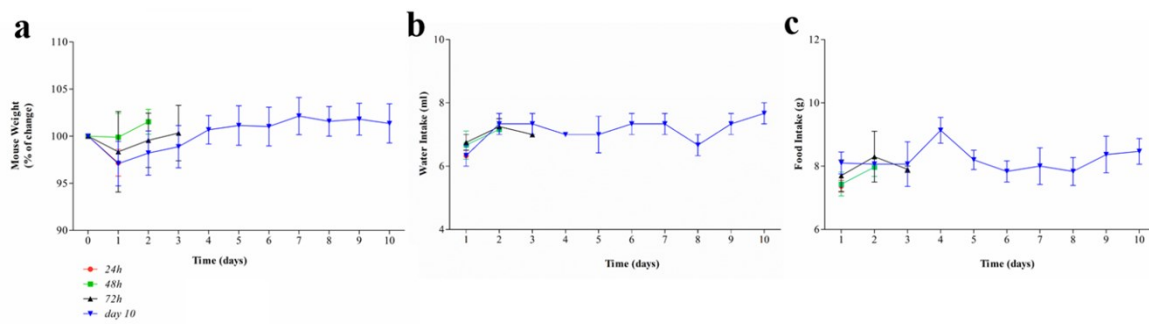

**Figure S2** Body weight (a), Water intake (b), and Food intake (c) of the animal models after inhalation of NAs. No significant changes were observed in all measured parameters.

**Figure S3**

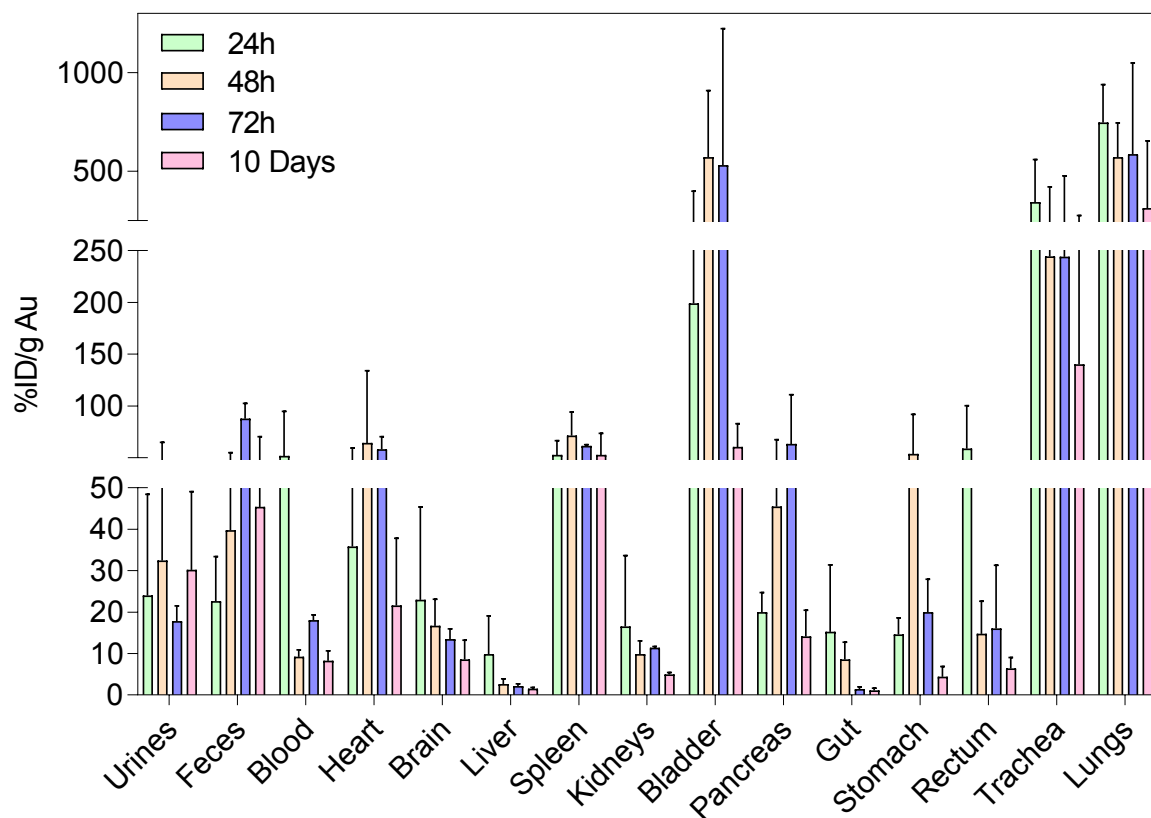

**Figure S3** Gold biodistribution (%ID/g) in organs and excretions (urine and feces) determined by ICP-MS at the selected time points (n=3).

**Figure S4**

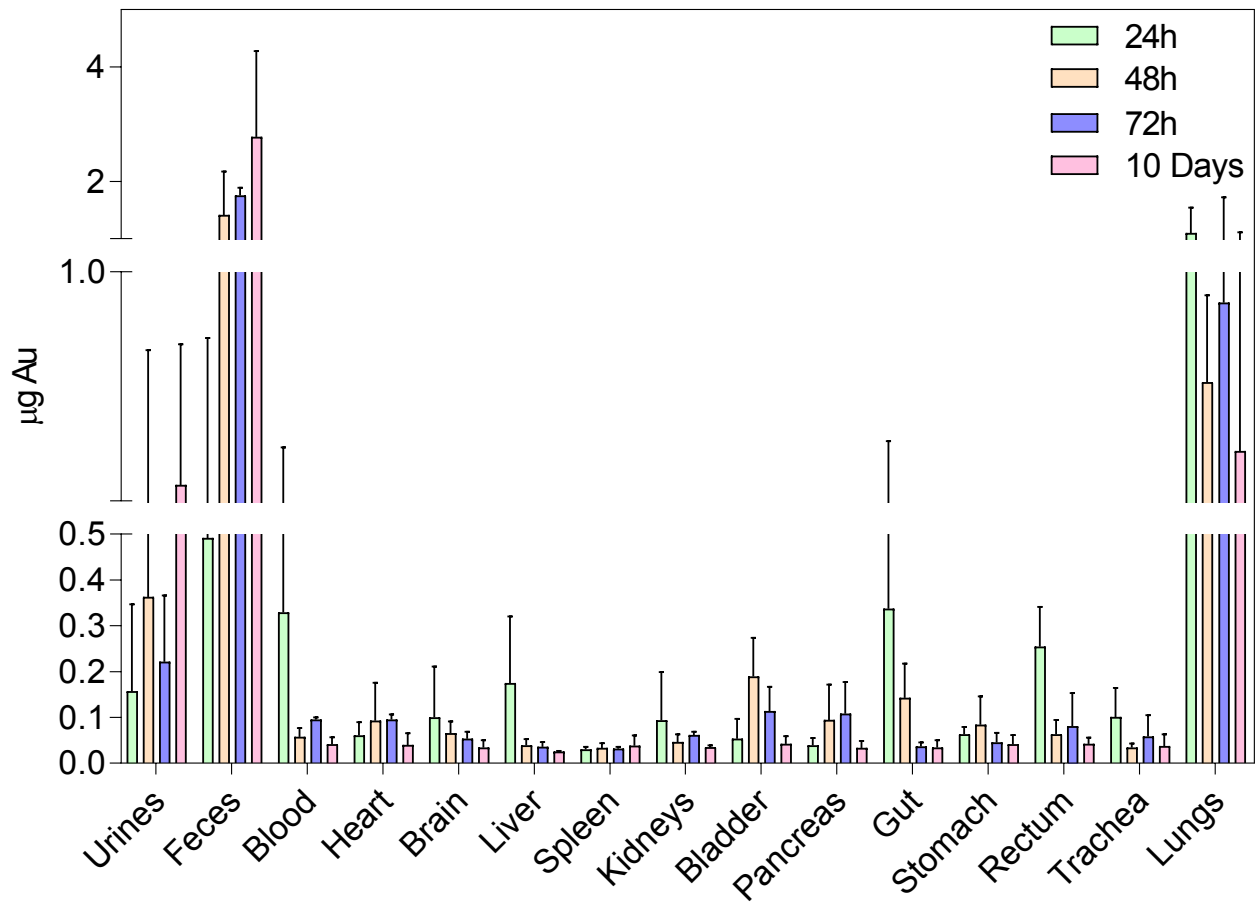

**Figure S4** Biodistribution ( $\mu\text{g}$ ) of gold in organs and in the excretions (urine and feces) determined by ICP-MS at the selected time points ( $n=3$ ). The cumulative amount of gold detected was  $3.8 \pm 1.0 \mu\text{g}$ .

**Figure S5**

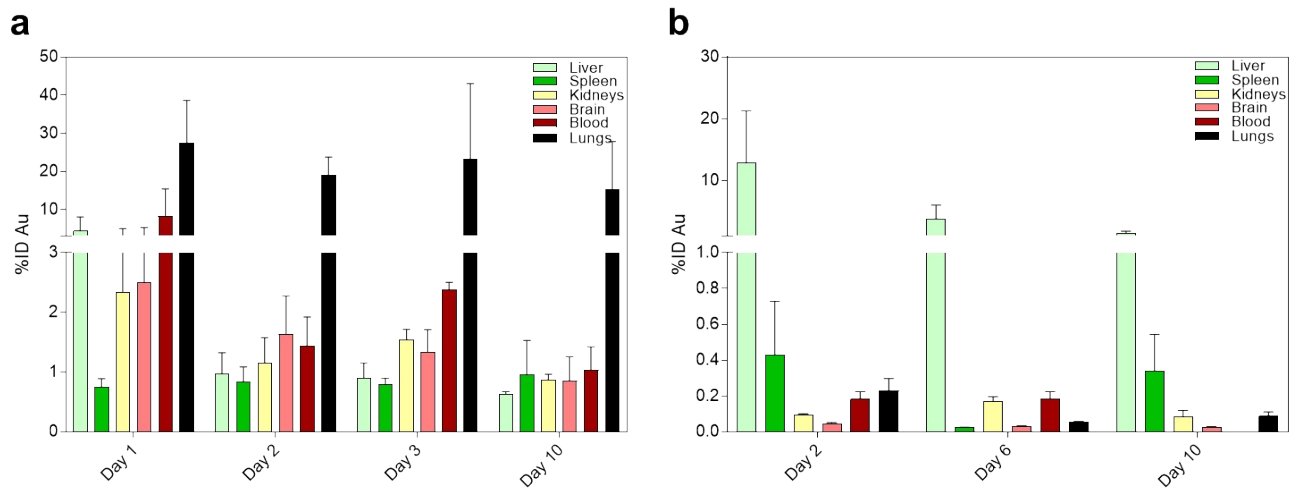

**Figure S5** Gold biodistribution assessment (%ID) in the main organs over 10 days. (a) IN administration (b) IV administration

**Figure S6**

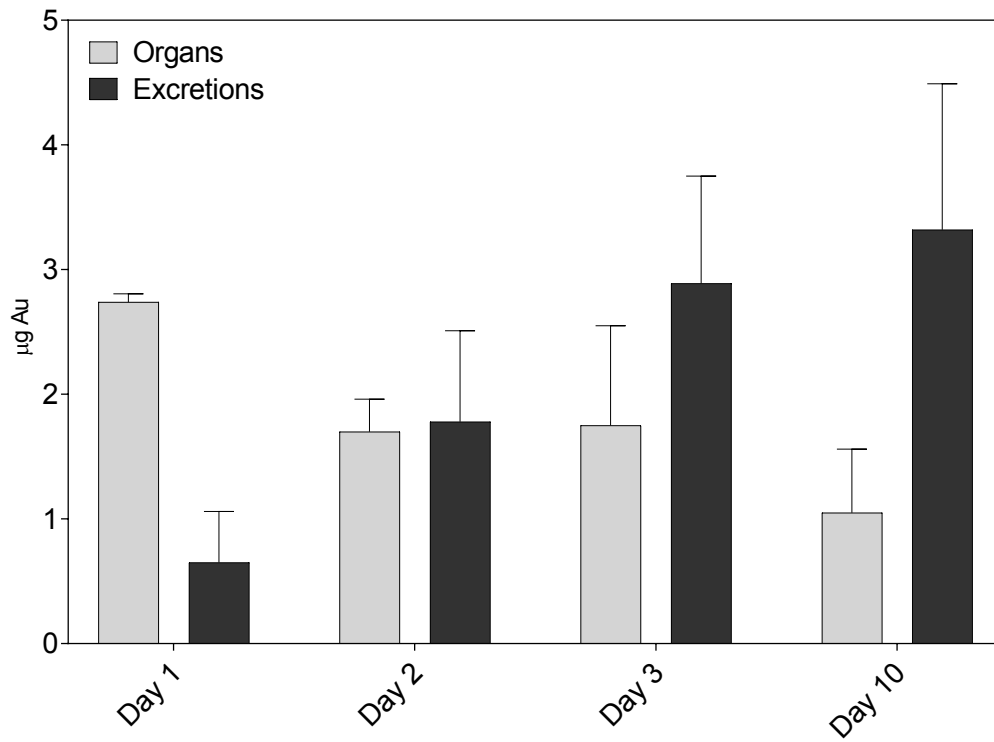

**Figure S6** Amount ( $\mu\text{g}$ ) of gold in organs (cumulative) and in the excretions (urine and feces, cumulative) determined by ICP-MS at the selected time points ( $n=3$ )

**Figure S7**

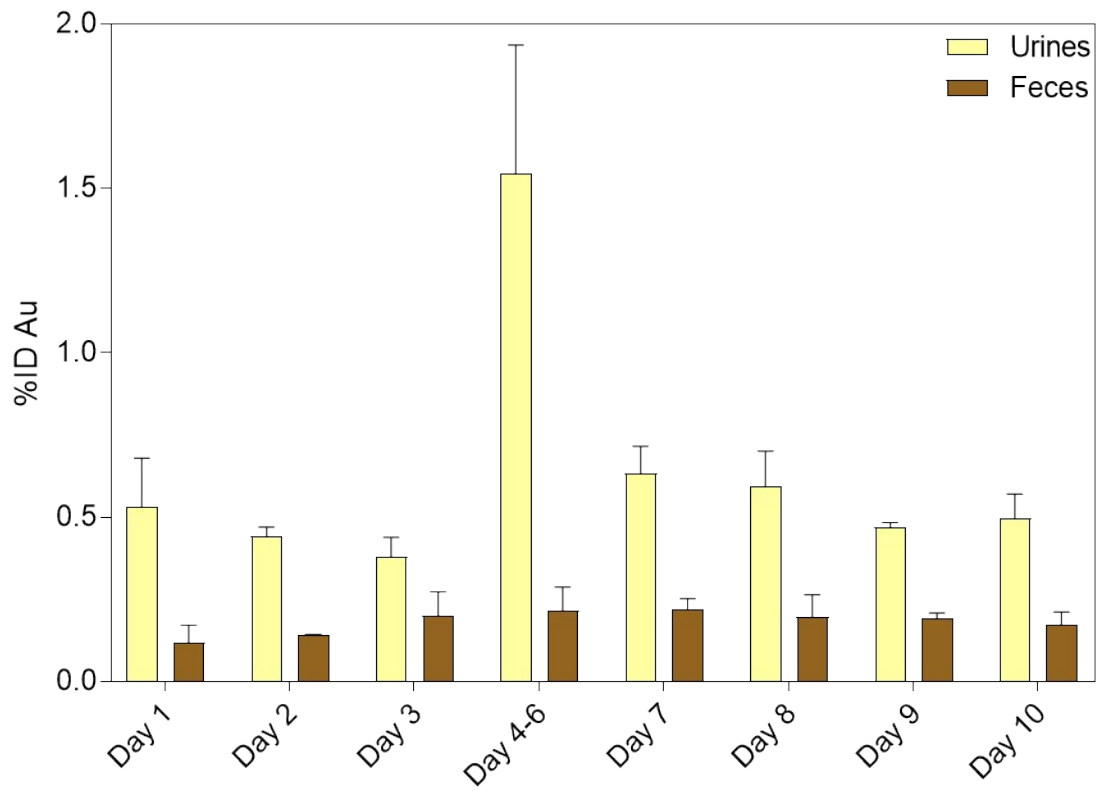

**Figure S7** Daily distribution of gold determined by ICP-MS in urine and feces during 10 days after the intravenous administration of NAs
